# Supplementary material for: 15N NMR studies provide insights into physico-chemical properties of room-temperature ionic liquids
Source: Royal Society of Chemistry journal article supplement (doi:10.1039/d1cp01492g), 2021-01-01
Supplement: d1cp01492g1.pdf [file d1cp01492g1.pdf]

# **$^{15}\text{N}$ NMR studies provide insights into physico-chemical properties of room-temperature ionic liquids**

## **Supplementary Material**

Christoph Wiedemann<sup>1,\*</sup>, David Fushman<sup>2</sup>, and Frank Bordusa<sup>1</sup>

<sup>1</sup>*Martin Luther University Halle-Wittenberg, Institute of Biochemistry and Biotechnology, Charles Tanford Protein Centre, Kurt-Mothes-Str. 3a, 06120 Halle/S., Germany*

<sup>2</sup>*Department of Chemistry and Biochemistry, University of Maryland, College Park, Maryland 20742, United States*

\**christoph.wiedemann@biochemtech.uni-halle.de*

May 15, 2021

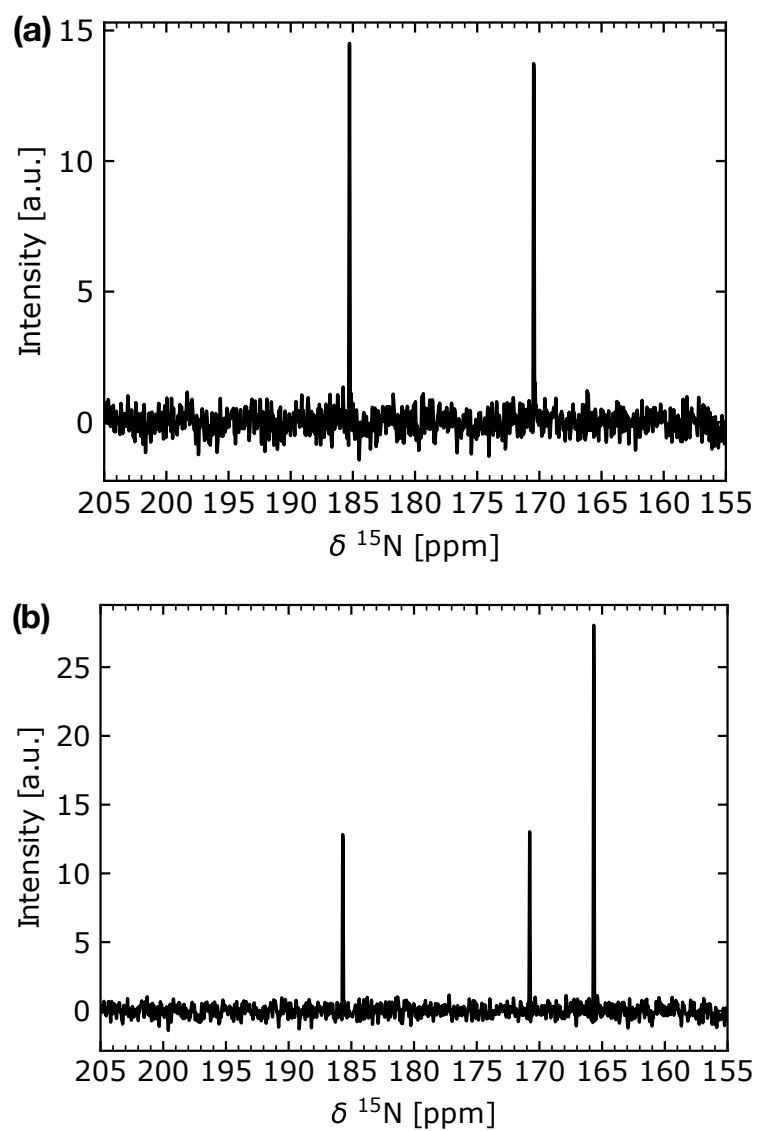

**Fig. S 1** 1D  $^{15}\text{N}$  spectra of  $[\text{C}_2\text{C}_1\text{IM}][\text{SCN}]$  (a) and  $[\text{C}_2\text{C}_1\text{IM}][\text{N}(\text{CN})_2]$  (b) are shown.

**Table S 1**  $T_1$   $^{15}\text{N}$  relaxation times ( $\pm$  standard deviation) of  $[\text{C}_2\text{C}_1\text{IM}]^+$ -based ILs at 293.2 K measured under  $^1\text{H}$  broadband decoupling.

|                                                                                              | $T_1$ [s]           |                               |
|----------------------------------------------------------------------------------------------|---------------------|-------------------------------|
|                                                                                              | 40.6 MHz            | 71 MHz                        |
| <b>(a)</b> $[\text{C}_2\text{C}_1\text{IM}][\text{CH}_3\text{CO}_2]$                         | N1 $4.16 \pm 0.14$  | $1.35 \pm 0.39$               |
|                                                                                              | N3 $3.53 \pm 0.10$  | $1.13 \pm 0.19$               |
| <b>(b)</b> $[\text{C}_2\text{C}_1\text{IM}][\text{CF}_3\text{CO}_2]$                         | N1 $11.20 \pm 0.42$ | $5.50 \pm 0.18$               |
|                                                                                              | N3 $9.80 \pm 0.17$  | $4.26 \pm 0.20$               |
| <b>(c)</b> $[\text{C}_2\text{C}_1\text{IM}][\text{BF}_4]$                                    | N1 $14.10 \pm 0.72$ | $6.63 \pm 0.56$               |
|                                                                                              | N3 $12.80 \pm 0.60$ | $6.68 \pm 0.18$               |
| <b>(d)</b> $[\text{C}_2\text{C}_1\text{IM}][(\text{C}_2\text{F}_5)_3\text{PF}_3]$            | N1                  | <sup>-a</sup> $5.48 \pm 0.22$ |
|                                                                                              | N3                  | <sup>-a</sup> $4.87 \pm 0.14$ |
| <b>(e)</b> $[\text{C}_2\text{C}_1\text{IM}][(\text{C}_2\text{H}_5)_2\text{PO}_4]$            | N1 $2.27 \pm 0.16$  | $1.18 \pm 0.18$               |
|                                                                                              | N3 $1.95 \pm 0.27$  | $1.16 \pm 0.06$               |
| <b>(f)</b> $[\text{C}_2\text{C}_1\text{IM}][\text{C}_2\text{H}_5\text{SO}_4]$                | N1 $4.46 \pm 0.16$  | $2.10 \pm 0.34$               |
|                                                                                              | N3 $3.47 \pm 0.28$  | $1.63 \pm 0.30$               |
| <b>(g)</b> $[\text{C}_2\text{C}_1\text{IM}][(\text{C}_5\text{H}_{11}\text{O}_2)\text{SO}_4]$ | N1 $3.15 \pm 0.20$  | $1.37 \pm 0.19$               |
|                                                                                              | N3 $4.21 \pm 0.74$  | $1.32 \pm 0.27$               |
| <b>(h)</b> $[\text{C}_2\text{C}_1\text{IM}][\text{C}_6\text{H}_{13}\text{SO}_4]$             | N1 $2.60 \pm 0.31$  | $1.21 \pm 0.18$               |
|                                                                                              | N3 $2.60 \pm 0.28$  | $1.08 \pm 0.26$               |
| <b>(i)</b> $[\text{C}_2\text{C}_1\text{IM}][\text{N}(\text{CN})_2]$                          | N1 $17.08 \pm 2.41$ | $6.54 \pm 0.67$               |
|                                                                                              | N3 $14.98 \pm 1.86$ | $7.19 \pm 1.07$               |
| <b>(j)</b> $[\text{C}_2\text{C}_1\text{IM}][\text{SCN}]$                                     | N1                  | <sup>-a</sup> $6.28 \pm 0.94$ |
|                                                                                              | N3                  | <sup>-a</sup> $4.39 \pm 0.03$ |

<sup>a</sup> no signal or insufficient signal intensity for a reliable evaluation

$$d = -(\mu_0 \hbar \gamma_N \gamma_H) / (8\pi A r_{NH}^3) \quad (S1)$$

$$c = -\omega_N (\delta_{||} - \delta_{\perp}) / 3 \quad (S2)$$

$$J(\omega) = \frac{2}{5} \left( \frac{\tau_c}{1 + (\omega \tau_c)^2} \right) \quad (S3)$$

$$R_1 = \frac{1}{T_1} = 3(d^2 + c^2)J(\omega_N) + d^2[J(\omega_H - \omega_N) + 6J(\omega_H + \omega_N)] \quad (S4)$$

$$R_2^{40.6\text{MHz}} = \frac{1}{T_2} = \frac{1}{2}(d^2 + c^2)[4J(0) + 3J(\omega_N)] + \frac{1}{2}d^2[J(\omega_H - \omega_N) + 6J(\omega_H) + 6J(\omega_H + \omega_N)] + B \quad (S5)$$

$$R_2^{71\text{MHz}} = \frac{1}{T_2} = \frac{1}{2}(d^2 + c^2)[4J(0) + 3J(\omega_N)] + \frac{1}{2}d^2[J(\omega_H - \omega_N) + 6J(\omega_H) + 6J(\omega_H + \omega_N)] + C \quad (S6)$$

$$NOE = 1 + \frac{\gamma_H}{\gamma_N} d^2 \frac{[6J(\omega_H + \omega_N) - J(\omega_H - \omega_N)]}{R_1} \quad (S7)$$

**Table S 2** Best-fit globally optimized parameters and calculated  $^{15}\text{N}$  relaxation times ( $T_1$ ,  $T_2$ ) and  $^{15}\text{N}$ - $\{^1\text{H}\}$  NOEs ( $NOE$ ) of  $[\text{C}_2\text{C}_1\text{IM}]^+$ -based ILs at 293.2 K. Experimental  $T_1$ ,  $T_2$  and  $NOE$  values are taken from Table 2 of the main manuscript. Eqs. (S1) to (S7) were employed for global optimization.

|                                                                                                    |    | $\tau_c$<br>[ns] | $ (\delta_{  } - \delta_{\perp}) $<br>[ppm] | A    | B    | C    | $T_1$ [s] |        | $T_2$ [s] |        | NOE      |        | $\chi^2$ |
|----------------------------------------------------------------------------------------------------|----|------------------|---------------------------------------------|------|------|------|-----------|--------|-----------|--------|----------|--------|----------|
|                                                                                                    |    |                  |                                             |      |      |      | 40.6 MHz  | 71 MHz | 40.6 MHz  | 71 MHz | 40.6 MHz | 71 MHz |          |
| <b>(a)</b> $[\text{C}_2\text{C}_1\text{IM}]$<br>$[\text{CH}_3\text{CO}_2]$                         | N1 | 0.86             | 191.54                                      | 1.06 | 0.43 | 0.14 | 3.01      | 1.28   | 1.22      | 0.89   | 0.44     | 0.93   | 0.00     |
|                                                                                                    | N3 | 0.86             | 198.68                                      | 1.09 | 0.29 | 0.00 | 2.85      | 1.19   | 1.43      | 0.95   | 0.49     | 0.94   | 0.00     |
| <b>(b)</b> $[\text{C}_2\text{C}_1\text{IM}]$<br>$[\text{CF}_3\text{CO}_2]$                         | N1 | 0.46             | 123.36 <sup>a</sup>                         | 1.15 | 0.34 | 0.21 | 10.51     | 4.93   | 2.25      | 2.25   | -0.49    | 0.72   | 1.03     |
|                                                                                                    | N3 | 0.26             | 178.02                                      | 1.12 | 0.19 | 0.11 | 9.66      | 4.19   | 3.28      | 2.56   | -0.50    | 0.61   | 0.45     |
| <b>(c)</b> $[\text{C}_2\text{C}_1\text{IM}]$<br>$[\text{BF}_4]$                                    | N1 | 0.68             | 84.04 <sup>a</sup>                          | 1.18 | 0.29 | 0.20 | 13.25     | 7.05   | 2.70      | 2.67   | -0.47    | 0.74   | 4.80     |
|                                                                                                    | N3 | 0.60             | 92.88 <sup>a</sup>                          | 1.20 | 0.18 | 0.14 | 12.66     | 6.51   | 3.69      | 3.05   | -0.53    | 0.73   | 15.50    |
| <b>(d)</b> $[\text{C}_2\text{C}_1\text{IM}]$<br>$[(\text{C}_2\text{F}_5)_3\text{PF}_3]$            | N1 | 0.15             | 248.68                                      | 1.08 | 0.40 | 0.23 | 9.44      | 3.71   | 1.91      | 1.83   | -0.14    | 0.65   | 9.87     |
|                                                                                                    | N3 | 0.80             | 97.43 <sup>a</sup>                          | 1.20 | 0.25 | 0.25 | 9.75      | 4.81   | 2.71      | 1.97   | -0.05    | 0.84   | 1.73     |
| <b>(e)</b> $[\text{C}_2\text{C}_1\text{IM}]$<br>$[(\text{C}_2\text{H}_5)_2\text{PO}_4]$            | N1 | 2.33             | 163.98                                      | 1.02 | 1.95 | 1.78 | 1.84      | 1.13   | 0.37      | 0.29   | 0.81     | 0.97   | 0.83     |
|                                                                                                    | N3 | 2.48             | 164.67                                      | 1.04 | 0.79 | 1.01 | 1.77      | 1.12   | 0.63      | 0.36   | 0.82     | 0.97   | 0.09     |
| <b>(f)</b> $[\text{C}_2\text{C}_1\text{IM}]$<br>$[\text{C}_2\text{H}_5\text{SO}_4]$                | N1 | 0.36             | 237.43                                      | 1.10 | 0.46 | 0.25 | 4.62      | 1.80   | 1.42      | 1.11   | 0.17     | 0.85   | 0.26     |
|                                                                                                    | N3 | 0.37             | 249.96                                      | 1.12 | 0.32 | 0.14 | 4.14      | 1.58   | 1.67      | 1.13   | 0.26     | 0.87   | 14.32    |
| <b>(g)</b> $[\text{C}_2\text{C}_1\text{IM}]$<br>$[(\text{C}_5\text{H}_{11}\text{O}_2)\text{SO}_4]$ | N1 | 1.00             | 174.07                                      | 1.05 | 0.36 | 0.20 | 3.06      | 1.37   | 1.34      | 0.87   | 0.46     | 0.93   | 0.03     |
|                                                                                                    | N3 | 1.16             | 170.05                                      | 1.06 | 0.20 | 0.04 | 2.74      | 1.29   | 1.56      | 0.93   | 0.51     | 0.94   | 0.01     |
| <b>(h)</b> $[\text{C}_2\text{C}_1\text{IM}]$<br>$[\text{C}_6\text{H}_{13}\text{SO}_4]$             | N1 | 1.41             | 170.07                                      | 1.09 | 0.68 | 0.89 | 2.55      | 1.20   | 0.86      | 0.48   | 0.71     | 0.96   | 0.72     |
|                                                                                                    | N3 | 2.06             | 156.04                                      | 1.05 | 0.50 | 0.69 | 2.13      | 1.24   | 0.89      | 0.48   | 0.76     | 0.96   | 0.98     |
| <b>(i)</b> $[\text{C}_2\text{C}_1\text{IM}]$<br>$[\text{N}(\text{CN})_2]$                          | N1 | 0.12             | 201.67                                      | 1.09 | 0.17 | 0.10 | 15.86     | 6.64   | 4.23      | 3.62   | -0.52    | 0.46   | 0.00     |
|                                                                                                    | N3 | 0.14             | 189.50                                      | 1.13 | 0.12 | 0.07 | 15.54     | 6.54   | 5.30      | 4.07   | -0.52    | 0.48   | 0.11     |
| <b>(j)</b> $[\text{C}_2\text{C}_1\text{IM}]$<br>$[\text{SCN}]$                                     | N1 | 1.04             | 80.47 <sup>a</sup>                          | 1.14 | 0.35 | 0.22 | 9.44      | 5.39   | 2.12      | 2.16   | -0.01    | 0.84   | 24.56    |
|                                                                                                    | N3 | 1.01             | 88.64 <sup>a</sup>                          | 1.15 | 0.29 | 0.19 | 8.42      | 4.65   | 2.31      | 2.16   | 0.01     | 0.85   | 19.07    |

<sup>a</sup> results were only obtained with fitting parameter outside specified bounds

**Table S 3** Best-fit globally optimized parameters and calculated  $^{15}\text{N}$  relaxation times ( $T_1$ ,  $T_2$ ) and  $^{15}\text{N}$ - $\{^1\text{H}\}$  NOEs ( $NOE$ ) of  $[\text{C}_2\text{C}_1\text{IM}]^+$ -based ILs at 293.2 K. Experimental  $T_2$  and  $NOE$  values are taken from Table 2 of the main manuscript.  $T_1$  values are taken from Table 3 of the main manuscript. Eqs. (S1) to (S7) were employed for global optimization.

|                                                                                                    |    | $\tau_c$<br>[ns] | $ \delta_{\parallel} - \delta_{\perp} $<br>[ppm] | A    | B    | C    | $T_1$ [s] |        | $T_2$ [s] |        | NOE      |        | $\chi^2$ |
|----------------------------------------------------------------------------------------------------|----|------------------|--------------------------------------------------|------|------|------|-----------|--------|-----------|--------|----------|--------|----------|
|                                                                                                    |    |                  |                                                  |      |      |      | 40.6 MHz  | 71 MHz | 40.6 MHz  | 71 MHz | 40.6 MHz | 71 MHz |          |
| <b>(a)</b> $[\text{C}_2\text{C}_1\text{IM}]$<br>$[\text{CH}_3\text{CO}_2]$                         | N1 | 0.48             | 223.97                                           | 1.16 | 0.54 | 0.36 | 4.16      | 1.57   | 1.22      | 0.89   | 0.44     | 0.92   | 0.24     |
|                                                                                                    | N3 | 0.46             | 249.82                                           | 1.14 | 0.37 | 0.14 | 3.52      | 1.31   | 1.43      | 0.95   | 0.49     | 0.92   | 0.69     |
| <b>(b)</b> $[\text{C}_2\text{C}_1\text{IM}]$<br>$[\text{CF}_3\text{CO}_2]$                         | N1 | 0.53             | 107.96 <sup>a</sup>                              | 1.16 | 0.34 | 0.23 | 11.22     | 5.49   | 2.25      | 2.25   | -0.49    | 0.73   | 1.23     |
|                                                                                                    | N3 | 0.23             | 188.00                                           | 1.09 | 0.19 | 0.12 | 9.81      | 4.22   | 3.28      | 2.56   | -0.50    | 0.58   | 0.07     |
| <b>(c)</b> $[\text{C}_2\text{C}_1\text{IM}]$<br>$[\text{BF}_4]$                                    | N1 | 0.15             | 193.34                                           | 1.11 | 0.29 | 0.19 | 14.61     | 6.10   | 2.70      | 2.67   | -0.47    | 0.51   | 1.67     |
|                                                                                                    | N3 | 0.16             | 178.54                                           | 1.12 | 0.20 | 0.15 | 15.15     | 6.42   | 3.69      | 3.05   | -0.53    | 0.51   | 14.47    |
| <b>(e)</b> $[\text{C}_2\text{C}_1\text{IM}]$<br>$[(\text{C}_2\text{H}_5)_2\text{PO}_4]$            | N1 | 1.83             | 165.30                                           | 1.10 | 2.13 | 2.08 | 2.27      | 1.17   | 0.37      | 0.29   | 0.80     | 0.97   | 0.74     |
|                                                                                                    | N3 | 2.28             | 162.76                                           | 1.05 | 0.88 | 1.18 | 1.95      | 1.16   | 0.63      | 0.36   | 0.82     | 0.97   | 0.09     |
| <b>(f)</b> $[\text{C}_2\text{C}_1\text{IM}]$<br>$[\text{C}_2\text{H}_5\text{SO}_4]$                | N1 | 0.87             | 145.22                                           | 1.06 | 0.44 | 0.30 | 4.46      | 2.10   | 1.42      | 1.11   | 0.17     | 0.88   | 0.00     |
|                                                                                                    | N3 | 2.08             | 56.93 <sup>a</sup>                               | 0.92 | 0.20 | 0.45 | 3.33      | 3.82   | 1.69      | 1.11   | 0.27     | 0.79   | 10.29    |
| <b>(g)</b> $[\text{C}_2\text{C}_1\text{IM}]$<br>$[(\text{C}_5\text{H}_{11}\text{O}_2)\text{SO}_4]$ | N1 | 0.93             | 179.59                                           | 1.07 | 0.37 | 0.22 | 3.15      | 1.37   | 1.34      | 0.87   | 0.46     | 0.93   | 0.03     |
|                                                                                                    | N3 | 0.43             | 244.31                                           | 1.17 | 0.35 | 0.26 | 3.97      | 1.46   | 1.56      | 0.93   | 0.51     | 0.92   | 0.31     |
| <b>(h)</b> $[\text{C}_2\text{C}_1\text{IM}]$<br>$[\text{C}_6\text{H}_{13}\text{SO}_4]$             | N1 | 1.41             | 168.77                                           | 1.09 | 0.68 | 0.91 | 2.59      | 1.22   | 0.86      | 0.48   | 0.71     | 0.96   | 0.73     |
|                                                                                                    | N3 | 1.16             | 190.64                                           | 1.16 | 0.66 | 0.85 | 2.60      | 1.09   | 0.89      | 0.48   | 0.76     | 0.97   | 1.13     |
| <b>(i)</b> $[\text{C}_2\text{C}_1\text{IM}]$<br>$[\text{N}(\text{CN})_2]$                          | N1 | 0.10             | 214.21                                           | 1.07 | 0.17 | 0.11 | 16.64     | 6.94   | 4.23      | 3.62   | -0.52    | 0.44   | 0.43     |
|                                                                                                    | N3 | 0.14             | 189.50                                           | 1.13 | 0.12 | 0.07 | 15.54     | 6.54   | 5.30      | 4.07   | -0.52    | 0.48   | 0.11     |

<sup>a</sup> results were only obtained with fitting parameter outside specified bounds

$$d = -(\mu_0 \hbar \gamma_N \gamma_H) / (8\pi A r_{NH}^3) \quad (S8)$$

$$c = -\omega_N (\delta_{\parallel} - \delta_{\perp}) / 3 \quad (S9)$$

$$J(\omega) = \frac{2}{5} \left( \frac{\tau_c}{1 + (\omega \tau_c)^2} \right) \quad (S10)$$

$$R_1 = \frac{1}{T_1} = 3(d^2 + c^2)J(\omega_N) + d^2[J(\omega_H - \omega_N) + 6J(\omega_H + \omega_N)] + D \quad (S11)$$

$$R_2^{40.6MHz} = \frac{1}{T_2} = \frac{1}{2}(d^2 + c^2)[4J(0) + 3J(\omega_N)] + \frac{1}{2}d^2[J(\omega_H - \omega_N) + 6J(\omega_H) + 6J(\omega_H + \omega_N)] + B \quad (S12)$$

$$R_2^{71MHz} = \frac{1}{T_2} = \frac{1}{2}(d^2 + c^2)[4J(0) + 3J(\omega_N)] + \frac{1}{2}d^2[J(\omega_H - \omega_N) + 6J(\omega_H) + 6J(\omega_H + \omega_N)] + C \quad (S13)$$

$$NOE = 1 + \frac{\gamma_H}{\gamma_N} d^2 \frac{[6J(\omega_H + \omega_N) - J(\omega_H - \omega_N)]}{R_1} \quad (S14)$$

**Table S 4** Best-fit globally optimized parameters and calculated  $^{15}\text{N}$  relaxation times ( $T_1$ ,  $T_2$ ) and  $^{15}\text{N}$ - $\{^1\text{H}\}$  NOEs ( $NOE$ ) of  $[\text{C}_2\text{C}_1\text{IM}]^+$ -based ILs at 293.2K. Experimental  $T_1$ ,  $T_2$  and  $NOE$  values are taken from Table 2 of the main manuscript. Eqs. (S8) to (S14) were employed for global optimization.

|                                                                                                    |    | $\tau_c$<br>[ns] | $ (\delta_{\parallel} - \delta_{\perp}) $<br>[ppm] | $A$  | $B$  | $C$   | $D$   | $T_1$ [s] |        | $T_2$ [s] |        | $NOE$    |        | $\chi^2$ |
|----------------------------------------------------------------------------------------------------|----|------------------|----------------------------------------------------|------|------|-------|-------|-----------|--------|-----------|--------|----------|--------|----------|
|                                                                                                    |    |                  |                                                    |      |      |       |       | 40.6 MHz  | 71 MHz | 40.6 MHz  | 71 MHz | 40.6 MHz | 71 MHz |          |
| <b>(a)</b> $[\text{C}_2\text{C}_1\text{IM}]$<br>$[\text{CH}_3\text{CO}_2]$                         | N1 | 0.86             | 191.17                                             | 1.06 | 0.43 | 0.14  | 0.00  | 3.01      | 1.28   | 1.22      | 0.89   | 0.44     | 0.93   | 0.00     |
|                                                                                                    | N3 | 0.88             | 198.60                                             | 1.09 | 0.28 | -0.02 | -0.01 | 2.87      | 1.19   | 1.43      | 0.95   | 0.49     | 0.94   | 0.00     |
| <b>(b)</b> $[\text{C}_2\text{C}_1\text{IM}]$<br>$[\text{CF}_3\text{CO}_2]$                         | N1 | 0.21             | 171.16                                             | 1.13 | 0.36 | 0.23  | 0.02  | 10.50     | 4.99   | 2.25      | 2.25   | -0.47    | 0.58   | 0.00     |
|                                                                                                    | N3 | 0.21             | 189.56                                             | 1.12 | 0.20 | 0.13  | 0.01  | 9.65      | 4.29   | 3.28      | 2.56   | -0.50    | 0.57   | 0.00     |
| <b>(c)</b> $[\text{C}_2\text{C}_1\text{IM}]$<br>$[\text{BF}_4]$                                    | N1 | 0.10             | 193.32                                             | 1.12 | 0.32 | 0.24  | 0.03  | 13.25     | 7.05   | 2.70      | 2.67   | -0.47    | 0.46   | 0.00     |
|                                                                                                    | N3 | 0.07             | 236.43                                             | 1.06 | 0.21 | 0.18  | 0.03  | 12.65     | 6.56   | 3.69      | 3.05   | -0.52    | 0.41   | 0.00     |
| <b>(d)</b> $[\text{C}_2\text{C}_1\text{IM}]$<br>$[(\text{C}_2\text{F}_5)_3\text{PF}_3]$            | N1 | 0.13             | 229.50                                             | 1.15 | 0.43 | 0.31  | 0.03  | 9.32      | 4.33   | 1.91      | 1.83   | -0.09    | 0.65   | 1.84     |
|                                                                                                    | N3 | 0.21             | 169.42                                             | 1.27 | 0.29 | 0.31  | 0.04  | 9.78      | 4.81   | 2.71      | 1.97   | 0.00     | 0.74   | 0.00     |
| <b>(e)</b> $[\text{C}_2\text{C}_1\text{IM}]$<br>$[(\text{C}_2\text{H}_5)_2\text{PO}_4]$            | N1 | 1.34             | 148.86                                             | 1.25 | 2.38 | 2.60  | 0.28  | 1.84      | 1.13   | 0.37      | 0.29   | 0.80     | 0.98   | 0.68     |
|                                                                                                    | N3 | 1.82             | 146.63                                             | 1.19 | 1.15 | 1.71  | 0.23  | 1.77      | 1.12   | 0.63      | 0.36   | 0.82     | 0.98   | 0.11     |
| <b>(f)</b> $[\text{C}_2\text{C}_1\text{IM}]$<br>$[\text{C}_2\text{H}_5\text{SO}_4]$                | N1 | 0.37             | 235.22                                             | 1.10 | 0.46 | 0.25  | 0.00  | 4.62      | 1.80   | 1.42      | 1.11   | 0.17     | 0.85   | 0.26     |
|                                                                                                    | N3 | 0.36             | 249.93                                             | 1.13 | 0.32 | 0.16  | 0.01  | 4.08      | 1.59   | 1.68      | 1.13   | 0.26     | 0.87   | 14.21    |
| <b>(g)</b> $[\text{C}_2\text{C}_1\text{IM}]$<br>$[(\text{C}_5\text{H}_{11}\text{O}_2)\text{SO}_4]$ | N1 | 0.82             | 183.51                                             | 1.10 | 0.41 | 0.28  | 0.04  | 3.06      | 1.37   | 1.34      | 0.87   | 0.46     | 0.93   | 0.03     |
|                                                                                                    | N3 | 0.78             | 188.20                                             | 1.15 | 0.31 | 0.22  | 0.09  | 2.74      | 1.29   | 1.56      | 0.93   | 0.51     | 0.94   | 0.02     |
| <b>(h)</b> $[\text{C}_2\text{C}_1\text{IM}]$<br>$[\text{C}_6\text{H}_{13}\text{SO}_4]$             | N1 | 1.02             | 178.75                                             | 1.18 | 0.80 | 1.11  | 0.09  | 2.55      | 1.20   | 0.86      | 0.48   | 0.71     | 0.97   | 0.78     |
|                                                                                                    | N3 | 0.96             | 158.13                                             | 1.33 | 0.86 | 1.37  | 0.25  | 2.13      | 1.24   | 0.89      | 0.48   | 0.76     | 0.97   | 1.14     |
| <b>(i)</b> $[\text{C}_2\text{C}_1\text{IM}]$<br>$[\text{N}(\text{CN})_2]$                          | N1 | 0.12             | 201.69                                             | 1.09 | 0.17 | 0.10  | 0.00  | 15.70     | 6.65   | 4.23      | 3.62   | -0.52    | 0.46   | 0.00     |
|                                                                                                    | N3 | 0.14             | 190.67                                             | 1.13 | 0.12 | 0.08  | 0.01  | 14.92     | 6.55   | 5.30      | 4.07   | -0.51    | 0.48   | 0.00     |
| <b>(j)</b> $[\text{C}_2\text{C}_1\text{IM}]$<br>$[\text{SCN}]$                                     | N1 | 0.09             | 232.62                                             | 1.14 | 0.41 | 0.30  | 0.05  | 9.45      | 5.11   | 2.12      | 2.16   | -0.01    | 0.65   | 5.78     |
|                                                                                                    | N3 | 0.09             | 249.98                                             | 1.15 | 0.36 | 0.28  | 0.06  | 8.42      | 4.61   | 2.31      | 2.16   | 0.02     | 0.66   | 2.20     |

**Table S 5** Best-fit globally optimized parameters and calculated  $^{15}\text{N}$  relaxation times ( $T_1$ ,  $T_2$ ) and  $^{15}\text{N}$ - $\{^1\text{H}\}$  NOEs ( $NOE$ ) of  $[\text{C}_2\text{C}_1\text{IM}]^+$ -based ILs at 293.2 K. Experimental  $T_2$  and  $NOE$  values are taken from Table 2 of the main manuscript.  $T_1$  values are taken from Table 3 of the main manuscript. Eqs. (S8) to (S14) were employed for global optimization.

|                                                                                                    |    | $\tau_c$<br>[ns] | $ (\delta_{\parallel} - \delta_{\perp}) $<br>[ppm] | $A$  | $B$  | $C$   | $D$   | $T_1$ [s] |        | $T_2$ [s] |        | $NOE$    |        | $\chi^2$ |
|----------------------------------------------------------------------------------------------------|----|------------------|----------------------------------------------------|------|------|-------|-------|-----------|--------|-----------|--------|----------|--------|----------|
|                                                                                                    |    |                  |                                                    |      |      |       |       | 40.6 MHz  | 71 MHz | 40.6 MHz  | 71 MHz | 40.6 MHz | 71 MHz |          |
| <b>(a)</b> $[\text{C}_2\text{C}_1\text{IM}]$<br>$[\text{CH}_3\text{CO}_2]$                         | N1 | 0.69             | 217.08                                             | 1.08 | 0.43 | 0.10  | -0.09 | 4.16      | 1.35   | 1.22      | 0.89   | 0.44     | 0.93   | 0.00     |
|                                                                                                    | N3 | 0.80             | 226.13                                             | 1.07 | 0.21 | -0.22 | -0.13 | 3.53      | 1.13   | 1.43      | 0.95   | 0.49     | 0.94   | 0.00     |
| <b>(b)</b> $[\text{C}_2\text{C}_1\text{IM}]$<br>$[\text{CF}_3\text{CO}_2]$                         | N1 | 0.21             | 160.55                                             | 1.16 | 0.37 | 0.26  | 0.02  | 11.20     | 5.50   | 2.25      | 2.25   | -0.47    | 0.58   | 0.00     |
|                                                                                                    | N3 | 0.21             | 191.91                                             | 1.11 | 0.19 | 0.12  | 0.00  | 9.80      | 4.26   | 3.28      | 2.56   | -0.50    | 0.57   | 0.00     |
| <b>(c)</b> $[\text{C}_2\text{C}_1\text{IM}]$<br>$[\text{BF}_4]$                                    | N1 | 0.10             | 212.11                                             | 1.08 | 0.31 | 0.22  | 0.01  | 14.10     | 6.63   | 2.70      | 2.67   | -0.47    | 0.46   | 0.00     |
|                                                                                                    | N3 | 0.07             | 233.50                                             | 1.07 | 0.21 | 0.19  | 0.03  | 12.80     | 6.68   | 3.69      | 3.05   | -0.52    | 0.41   | 0.00     |
| <b>(e)</b> $[\text{C}_2\text{C}_1\text{IM}]$<br>$[(\text{C}_2\text{H}_5)_2\text{PO}_4]$            | N1 | 0.99             | 172.58                                             | 1.29 | 2.39 | 2.58  | 0.18  | 2.27      | 1.18   | 0.37      | 0.29   | 0.80     | 0.98   | 0.67     |
|                                                                                                    | N3 | 1.92             | 152.99                                             | 1.15 | 1.08 | 1.56  | 0.13  | 1.95      | 1.16   | 0.63      | 0.36   | 0.82     | 0.98   | 0.11     |
| <b>(f)</b> $[\text{C}_2\text{C}_1\text{IM}]$<br>$[\text{C}_2\text{H}_5\text{SO}_4]$                | N1 | 0.60             | 164.54                                             | 1.13 | 0.50 | 0.38  | 0.04  | 4.46      | 2.10   | 1.42      | 1.11   | 0.17     | 0.88   | 0.00     |
|                                                                                                    | N3 | 0.17             | 247.00                                             | 1.21 | 0.47 | 0.56  | 0.19  | 3.41      | 2.09   | 1.69      | 1.11   | 0.27     | 0.80   | 3.16     |
| <b>(g)</b> $[\text{C}_2\text{C}_1\text{IM}]$<br>$[(\text{C}_5\text{H}_{11}\text{O}_2)\text{SO}_4]$ | N1 | 0.87             | 183.05                                             | 1.08 | 0.39 | 0.24  | 0.01  | 3.15      | 1.37   | 1.34      | 0.87   | 0.46     | 0.93   | 0.03     |
|                                                                                                    | N3 | 0.59             | 184.32                                             | 1.25 | 0.41 | 0.46  | 0.06  | 3.97      | 1.75   | 1.56      | 0.92   | 0.52     | 0.94   | 1.51     |
| <b>(h)</b> $[\text{C}_2\text{C}_1\text{IM}]$<br>$[\text{C}_6\text{H}_{13}\text{SO}_4]$             | N1 | 0.67             | 205.21                                             | 1.26 | 0.86 | 1.22  | 0.12  | 2.60      | 1.21   | 0.86      | 0.48   | 0.71     | 0.96   | 0.74     |
|                                                                                                    | N3 | 0.57             | 240.95                                             | 1.31 | 0.77 | 1.06  | 0.08  | 2.60      | 1.08   | 0.89      | 0.48   | 0.76     | 0.97   | 1.07     |
| <b>(i)</b> $[\text{C}_2\text{C}_1\text{IM}]$<br>$[\text{N}(\text{CN})_2]$                          | N1 | 0.10             | 216.23                                             | 1.07 | 0.17 | 0.11  | 0.00  | 16.64     | 6.93   | 4.23      | 3.63   | -0.52    | 0.44   | 0.44     |
|                                                                                                    | N3 | 0.14             | 174.78                                             | 1.17 | 0.13 | 0.10  | 0.02  | 14.90     | 7.19   | 5.30      | 4.07   | -0.51    | 0.48   | 0.00     |

$$d = -(\mu_0 \hbar \gamma_N \gamma_H) / (8\pi A r_{NH}^3) \quad (S15)$$

$$c = -\omega_N (\delta_{||} - \delta_{\perp}) / 3 \quad (S16)$$

$$J(\omega) = \frac{2}{5} \left( \frac{\tau_c}{1 + (\omega \tau_c)^2} \right) \quad (S17)$$

$$R_1 = \frac{1}{T_1} = 3(d^2 + c^2)J(\omega_N) + d^2[J(\omega_H - \omega_N) + 6J(\omega_H + \omega_N)] \quad (S18)$$

$$R_2 = \frac{1}{T_2} = \frac{1}{2}(d^2 + c^2)[4J(0) + 3J(\omega_N)] + \frac{1}{2}d^2[J(\omega_H - \omega_N) + 6J(\omega_H) + 6J(\omega_H + \omega_N)] + B \quad (S19)$$

$$NOE = 1 + \frac{\gamma_H}{\gamma_N} d^2 \frac{[6J(\omega_H + \omega_N) - J(\omega_H - \omega_N)]}{R_1} \quad (S20)$$

**Table S 6** Best-fit globally optimized parameters and calculated  $^{15}\text{N}$  relaxation times ( $T_1$ ,  $T_2$ ) and  $^{15}\text{N}$ - $\{^1\text{H}\}$  NOEs ( $NOE$ ) of  $[\text{C}_2\text{C}_1\text{IM}]^+$ -based ILs at 293.2 K. Experimental  $T_1$ ,  $T_2$  and  $NOE$  values are taken from Table 2 of the main manuscript. Eqs. (S15) to (S20) were employed for global optimization.

|                                                                                                    |    | $\tau_c$<br>[ns] | $ (\delta_{  } - \delta_{\perp}) $<br>[ppm] | $A$  | $B$  | $T_1$ [s] |        | $T_2$ [s] |        | $NOE$    |        | $\chi^2$ |
|----------------------------------------------------------------------------------------------------|----|------------------|---------------------------------------------|------|------|-----------|--------|-----------|--------|----------|--------|----------|
|                                                                                                    |    |                  |                                             |      |      | 40.6 MHz  | 71 MHz | 40.6 MHz  | 71 MHz | 40.6 MHz | 71 MHz |          |
| <b>(a)</b> $[\text{C}_2\text{C}_1\text{IM}]$<br>$[\text{CH}_3\text{CO}_2]$                         | N1 | 0.86             | 191.22                                      | 1.06 | 0.30 | 3.01      | 1.28   | 1.45      | 0.78   | 0.44     | 0.93   | 3.15     |
|                                                                                                    | N3 | 0.87             | 196.20                                      | 1.09 | 0.19 | 2.88      | 1.21   | 1.66      | 0.81   | 0.49     | 0.94   | 2.36     |
| <b>(b)</b> $[\text{C}_2\text{C}_1\text{IM}]$<br>$[\text{CF}_3\text{CO}_2]$                         | N1 | 0.57             | 106.19 <sup>a</sup>                         | 1.14 | 0.25 | 10.49     | 5.26   | 2.79      | 2.09   | -0.50    | 0.73   | 8.96     |
|                                                                                                    | N3 | 0.31             | 160.37                                      | 1.14 | 0.17 | 9.66      | 4.27   | 3.55      | 2.28   | -0.50    | 0.65   | 5.15     |
| <b>(c)</b> $[\text{C}_2\text{C}_1\text{IM}]$<br>$[\text{BF}_4]$                                    | N1 | 0.68             | 83.98 <sup>a</sup>                          | 1.18 | 0.22 | 13.24     | 7.05   | 3.29      | 2.56   | -0.47    | 0.74   | 6.91     |
|                                                                                                    | N3 | 0.63             | 89.23 <sup>a</sup>                          | 1.19 | 0.16 | 12.64     | 6.65   | 4.02      | 2.93   | -0.53    | 0.73   | 18.00    |
| <b>(d)</b> $[\text{C}_2\text{C}_1\text{IM}]$<br>$[(\text{C}_2\text{F}_5)_3\text{PF}_3]$            | N1 | 0.50             | 133.08                                      | 1.17 | 0.33 | 9.37      | 4.08   | 2.24      | 1.62   | -0.14    | 0.81   | 15.03    |
|                                                                                                    | N3 | 0.80             | 97.36 <sup>a</sup>                          | 1.20 | 0.25 | 9.75      | 4.82   | 2.72      | 1.97   | -0.05    | 0.84   | 1.73     |
| <b>(e)</b> $[\text{C}_2\text{C}_1\text{IM}]$<br>$[(\text{C}_2\text{H}_5)_2\text{PO}_4]$            | N1 | 2.33             | 163.71                                      | 1.02 | 1.86 | 1.84      | 1.13   | 0.38      | 0.28   | 0.80     | 0.97   | 0.91     |
|                                                                                                    | N3 | 2.53             | 165.64                                      | 1.05 | 0.78 | 1.77      | 1.12   | 0.63      | 0.39   | 0.83     | 0.97   | 0.36     |
| <b>(f)</b> $[\text{C}_2\text{C}_1\text{IM}]$<br>$[\text{C}_2\text{H}_5\text{SO}_4]$                | N1 | 0.97             | 131.77 <sup>a</sup>                         | 1.05 | 0.41 | 4.63      | 2.30   | 1.51      | 1.03   | 0.17     | 0.88   | 4.29     |
|                                                                                                    | N3 | 0.87             | 166.51                                      | 1.06 | 0.26 | 3.55      | 1.62   | 1.70      | 0.96   | 0.27     | 0.90   | 31.22    |
| <b>(g)</b> $[\text{C}_2\text{C}_1\text{IM}]$<br>$[(\text{C}_5\text{H}_{11}\text{O}_2)\text{SO}_4]$ | N1 | 1.10             | 163.66                                      | 1.04 | 0.32 | 3.06      | 1.43   | 1.40      | 0.80   | 0.46     | 0.93   | 1.18     |
|                                                                                                    | N3 | 1.21             | 164.53                                      | 1.05 | 0.19 | 2.74      | 1.33   | 1.58      | 0.82   | 0.50     | 0.93   | 2.86     |
| <b>(h)</b> $[\text{C}_2\text{C}_1\text{IM}]$<br>$[\text{C}_6\text{H}_{13}\text{SO}_4]$             | N1 | 1.41             | 170.08                                      | 1.09 | 0.76 | 2.55      | 1.20   | 0.80      | 0.51   | 0.71     | 0.96   | 1.28     |
|                                                                                                    | N3 | 2.13             | 156.83                                      | 1.07 | 0.50 | 2.13      | 1.24   | 0.88      | 0.52   | 0.79     | 0.97   | 1.36     |
| <b>(i)</b> $[\text{C}_2\text{C}_1\text{IM}]$<br>$[\text{N}(\text{CN})_2]$                          | N1 | 0.13             | 196.54                                      | 1.10 | 0.16 | 15.98     | 6.71   | 4.36      | 3.02   | -0.52    | 0.47   | 2.09     |
|                                                                                                    | N3 | 0.16             | 179.90                                      | 1.15 | 0.11 | 15.52     | 6.59   | 5.42      | 3.48   | -0.54    | 0.49   | 5.26     |
| <b>(j)</b> $[\text{C}_2\text{C}_1\text{IM}]$<br>$[\text{SCN}]$                                     | N1 | 1.09             | 76.85 <sup>a</sup>                          | 1.13 | 0.32 | 9.44      | 5.61   | 2.27      | 1.82   | -0.01    | 0.83   | 27.22    |
|                                                                                                    | N3 | 1.03             | 86.51 <sup>a</sup>                          | 1.15 | 0.21 | 8.42      | 4.74   | 2.89      | 2.08   | 0.00     | 0.84   | 23.84    |

<sup>a</sup> results were only obtained with fitting parameter outside specified bounds



$$d = -(\mu_0 \hbar \gamma_N \gamma_H) / (8\pi A r_{NH}^3) \quad (S21)$$

$$c = -\omega_N (\delta_{\parallel} - \delta_{\perp}) / 3 \quad (S22)$$

$$J(\omega) = \frac{2}{5} \left( \frac{\tau_c}{1 + (\omega \tau_c)^2} \right) \quad (S23)$$

$$R_1 = \frac{1}{T_1} = 3(d^2 + c^2)J(\omega_N) + d^2[J(\omega_H - \omega_N) + 6J(\omega_H + \omega_N)] \quad (S24)$$

$$R_2^{40.6\text{MHz}} = \frac{1}{T_2} = \frac{1}{2}(d^2 + c^2)[4J(0) + 3J(\omega_N)] + \frac{1}{2}d^2[J(\omega_H - \omega_N) + 6J(\omega_H) + 6J(\omega_H + \omega_N)] + B \quad (S25)$$

$$R_2^{71\text{MHz}} = \frac{1}{T_2} = \frac{1}{2}(d^2 + c^2)[4J(0) + 3J(\omega_N)] + \frac{1}{2}d^2[J(\omega_H - \omega_N) + 6J(\omega_H) + 6J(\omega_H + \omega_N)] + \left( \frac{71\text{MHz}}{40.6\text{MHz}} \right)^2 B \quad (S26)$$

$$NOE = 1 + \frac{\gamma_H}{\gamma_N} d^2 \frac{[6J(\omega_H + \omega_N) - J(\omega_H - \omega_N)]}{R_1} \quad (S27)$$

**Table S 7** Best-fit globally optimized parameters and calculated  $^{15}\text{N}$  relaxation times ( $T_1$ ,  $T_2$ ) and  $^{15}\text{N}$ - $\{^1\text{H}\}$  NOEs ( $NOE$ ) of  $[\text{C}_2\text{C}_1\text{IM}]^+$ -based ILs at 293.2 K. Experimental  $T_1$ ,  $T_2$  and  $NOE$  values are taken from Table 2 of the main manuscript. Eqs. (S21) to (S27) were employed for global optimization.

|                                                                                                    |    | $\tau_c$<br>[ns] | $ (\delta_{\parallel} - \delta_{\perp}) $<br>[ppm] | $A$  | $B$  | $T_1$ [s] |        | $T_2$ [s] |        | $NOE$    |        | $\chi^2$ |
|----------------------------------------------------------------------------------------------------|----|------------------|----------------------------------------------------|------|------|-----------|--------|-----------|--------|----------|--------|----------|
|                                                                                                    |    |                  |                                                    |      |      | 40.6 MHz  | 71 MHz | 40.6 MHz  | 71 MHz | 40.6 MHz | 71 MHz |          |
| <b>(a)</b> $[\text{C}_2\text{C}_1\text{IM}]$<br>$[\text{CH}_3\text{CO}_2]$                         | N1 | 1.11             | 171.96                                             | 1.01 | 0.07 | 2.69      | 1.28   | 1.95      | 0.80   | 0.44     | 0.93   | 9.78     |
|                                                                                                    | N3 | 1.06             | 181.56                                             | 1.06 | 0.03 | 2.67      | 1.21   | 2.08      | 0.84   | 0.49     | 0.94   | 5.26     |
| <b>(b)</b> $[\text{C}_2\text{C}_1\text{IM}]$<br>$[\text{CF}_3\text{CO}_2]$                         | N1 | 0.58             | 105.74 <sup>a</sup>                                | 1.14 | 0.08 | 10.47     | 5.26   | 5.31      | 2.10   | -0.49    | 0.74   | 48.55    |
|                                                                                                    | N3 | 0.40             | 139.50 <sup>a</sup>                                | 1.15 | 0.07 | 9.64      | 4.41   | 5.44      | 2.11   | -0.50    | 0.69   | 50.68    |
| <b>(c)</b> $[\text{C}_2\text{C}_1\text{IM}]$<br>$[\text{BF}_4]$                                    | N1 | 0.68             | 83.85 <sup>a</sup>                                 | 1.18 | 0.07 | 13.23     | 7.05   | 6.38      | 2.56   | -0.47    | 0.74   | 22.72    |
|                                                                                                    | N3 | 0.67             | 85.38 <sup>a</sup>                                 | 1.19 | 0.06 | 12.55     | 6.79   | 6.84      | 2.85   | -0.53    | 0.73   | 64.37    |
| <b>(d)</b> $[\text{C}_2\text{C}_1\text{IM}]$<br>$[(\text{C}_2\text{F}_5)_3\text{PF}_3]$            | N1 | 0.49             | 134.22                                             | 1.17 | 0.11 | 9.36      | 4.06   | 4.27      | 1.57   | -0.14    | 0.81   | 20.87    |
|                                                                                                    | N3 | 0.96             | 87.65 <sup>a</sup>                                 | 1.16 | 0.09 | 8.92      | 4.90   | 4.64      | 1.91   | -0.05    | 0.84   | 25.62    |
| <b>(e)</b> $[\text{C}_2\text{C}_1\text{IM}]$<br>$[(\text{C}_2\text{H}_5)_2\text{PO}_4]$            | N1 | 2.39             | 161.51                                             | 1.01 | 0.70 | 1.84      | 1.15   | 0.68      | 0.26   | 0.80     | 0.97   | 10.58    |
|                                                                                                    | N3 | 2.48             | 158.97                                             | 1.01 | 0.78 | 1.77      | 1.17   | 0.63      | 0.24   | 0.78     | 0.96   | 10.90    |
| <b>(f)</b> $[\text{C}_2\text{C}_1\text{IM}]$<br>$[\text{C}_2\text{H}_5\text{SO}_4]$                | N1 | 1.89             | 50.37 <sup>a</sup>                                 | 0.96 | 0.23 | 4.57      | 5.03   | 1.98      | 0.99   | 0.17     | 0.77   | 35.14    |
|                                                                                                    | N3 | 0.37             | 249.91                                             | 1.12 | 0.26 | 4.15      | 1.59   | 1.87      | 0.65   | 0.26     | 0.87   | 18.36    |
| <b>(g)</b> $[\text{C}_2\text{C}_1\text{IM}]$<br>$[(\text{C}_5\text{H}_{11}\text{O}_2)\text{SO}_4]$ | N1 | 1.26             | 149.21                                             | 1.02 | 0.15 | 3.06      | 1.55   | 1.85      | 0.75   | 0.46     | 0.93   | 13.04    |
|                                                                                                    | N3 | 1.36             | 152.16                                             | 1.03 | 0.14 | 2.74      | 1.43   | 1.70      | 0.71   | 0.50     | 0.93   | 24.67    |
| <b>(h)</b> $[\text{C}_2\text{C}_1\text{IM}]$<br>$[\text{C}_6\text{H}_{13}\text{SO}_4]$             | N1 | 1.41             | 169.94                                             | 1.09 | 0.35 | 2.55      | 1.20   | 1.20      | 0.44   | 0.71     | 0.96   | 4.67     |
|                                                                                                    | N3 | 2.05             | 153.71                                             | 1.03 | 0.38 | 2.11      | 1.26   | 0.99      | 0.39   | 0.73     | 0.96   | 5.59     |
| <b>(i)</b> $[\text{C}_2\text{C}_1\text{IM}]$<br>$[\text{N}(\text{CN})_2]$                          | N1 | 0.93             | 67.32 <sup>a</sup>                                 | 1.09 | 0.07 | 10.14     | 6.99   | 5.41      | 2.48   | -0.53    | 0.70   | 35.91    |
|                                                                                                    | N3 | 0.97             | 64.39 <sup>a</sup>                                 | 1.08 | 0.04 | 8.93      | 6.72   | 5.96      | 3.21   | -0.59    | 0.66   | 57.98    |
| <b>(j)</b> $[\text{C}_2\text{C}_1\text{IM}]$<br>$[\text{SCN}]$                                     | N1 | 1.17             | 71.42 <sup>a</sup>                                 | 1.12 | 0.14 | 9.43      | 5.96   | 3.75      | 1.52   | -0.01    | 0.83   | 63.75    |
|                                                                                                    | N3 | 1.03             | 86.49 <sup>a</sup>                                 | 1.15 | 0.07 | 8.42      | 4.74   | 4.86      | 2.09   | 0.00     | 0.84   | 46.10    |

<sup>a</sup> results were only obtained with fitting parameter outside specified bounds

$$d = -(\mu_0 \hbar \gamma_N \gamma_H) / (8\pi A r_{NH}^3) \quad (S28)$$

$$c = -\omega_N (\delta_{||} - \delta_{\perp}) / 3 \quad (S29)$$

$$J(\omega) = \frac{2}{5} \left( \frac{\tau_c}{1 + (\omega \tau_c)^2} \right) \quad (S30)$$

$$R_1 = \frac{1}{T_1} = 3(d^2 + c^2)J(\omega_N) + d^2[J(\omega_H - \omega_N) + 6J(\omega_H + \omega_N)] \quad (S31)$$

$$R_2 = \frac{1}{T_2} = \frac{1}{2}(d^2 + c^2)[4J(0) + 3J(\omega_N)] + \frac{1}{2}d^2[J(\omega_H - \omega_N) + 6J(\omega_H) + 6J(\omega_H + \omega_N)] \quad (S32)$$

$$NOE = 1 + \frac{\gamma_H}{\gamma_N} d^2 \frac{[6J(\omega_H + \omega_N) - J(\omega_H - \omega_N)]}{R_1} \quad (S33)$$

**Table S 8** Best-fit globally optimized parameters and calculated  $^{15}\text{N}$  relaxation times ( $T_1$ ,  $T_2$ ) and  $^{15}\text{N}$ - $\{^1\text{H}\}$  NOEs ( $NOE$ ) of  $[\text{C}_2\text{C}_1\text{IM}]^+$ -based ILs at 293.2 K. Experimental  $T_1$ ,  $T_2$  and  $NOE$  values are taken from Table 2 of the main manuscript. Eqs. (S28) to (S33) were employed for global optimization.

|                                                                                                    |    | $\tau_c$<br>[ns] | $ (\delta_{  } - \delta_{\perp}) $<br>[ppm] | $A$               | $T_1$ [s] |        | $T_2$ [s] |        | $NOE$    |        | $\chi^2$ |
|----------------------------------------------------------------------------------------------------|----|------------------|---------------------------------------------|-------------------|-----------|--------|-----------|--------|----------|--------|----------|
|                                                                                                    |    |                  |                                             |                   | 40.6 MHz  | 71 MHz | 40.6 MHz  | 71 MHz | 40.6 MHz | 71 MHz |          |
| <b>(a)</b> $[\text{C}_2\text{C}_1\text{IM}]$<br>$[\text{CH}_3\text{CO}_2]$                         | N1 | 1.27             | 163.49                                      | 0.99              | 2.49      | 1.28   | 2.06      | 0.93   | 0.45     | 0.92   | 12.39    |
|                                                                                                    | N3 | 1.11             | 178.56                                      | 1.05              | 2.59      | 1.20   | 2.16      | 0.91   | 0.49     | 0.93   | 5.67     |
| <b>(b)</b> $[\text{C}_2\text{C}_1\text{IM}]$<br>$[\text{CF}_3\text{CO}_2]$                         | N1 | 0.14             | 240.91                                      | 1.05              | 10.38     | 4.25   | 9.26      | 3.69   | -0.38    | 0.54   | 137.73   |
|                                                                                                    | N3 | 0.20             | 203.08                                      | 1.10              | 9.61      | 4.09   | 8.61      | 3.54   | -0.50    | 0.56   | 113.11   |
| <b>(c)</b> $[\text{C}_2\text{C}_1\text{IM}]$<br>$[\text{BF}_4]$                                    | N1 | 0.68             | 83.84 <sup>a</sup>                          | 1.18              | 13.18     | 7.03   | 11.68     | 5.79   | -0.47    | 0.75   | 100.82   |
|                                                                                                    | N3 | 0.18             | 186.57                                      | 1.13              | 12.63     | 5.38   | 11.32     | 4.66   | -0.52    | 0.52   | 192.61   |
| <b>(d)</b> $[\text{C}_2\text{C}_1\text{IM}]$<br>$[(\text{C}_2\text{F}_5)_3\text{PF}_3]$            | N1 | 0.18             | 230.23                                      | 1.10              | 9.42      | 3.72   | 8.34      | 3.21   | -0.14    | 0.67   | 26.02    |
|                                                                                                    | N3 | 3.22             | 81.57 <sup>a</sup>                          | 1.44              | 7.49      | 5.06   | 4.65      | 1.99   | 0.91     | 0.99   | 97.34    |
| <b>(e)</b> $[\text{C}_2\text{C}_1\text{IM}]$<br>$[(\text{C}_2\text{H}_5)_2\text{PO}_4]$            | N1 | 5.83             | 172.82                                      | 1.14              | 1.84      | 1.60   | 0.70      | 0.28   | 0.96     | 0.99   | 26.42    |
|                                                                                                    | N3 | 6.12             | 184.04                                      | 1.25              | 1.76      | 1.49   | 0.63      | 0.24   | 0.98     | 0.99   | 28.23    |
| <b>(f)</b> $[\text{C}_2\text{C}_1\text{IM}]$<br>$[\text{C}_2\text{H}_5\text{SO}_4]$                | N1 | 0.36             | 243.47                                      | 1.09              | 4.43      | 1.72   | 3.88      | 1.46   | 0.17     | 0.85   | 96.96    |
|                                                                                                    | N3 | 0.38             | 249.79                                      | 1.12              | 4.06      | 1.56   | 3.55      | 1.32   | 0.26     | 0.87   | 43.76    |
| <b>(g)</b> $[\text{C}_2\text{C}_1\text{IM}]$<br>$[(\text{C}_5\text{H}_{11}\text{O}_2)\text{SO}_4]$ | N1 | 0.96             | 179.87                                      | 1.06              | 3.05      | 1.33   | 2.58      | 1.04   | 0.48     | 0.93   | 30.88    |
|                                                                                                    | N3 | 1.83             | 139.45 <sup>a</sup>                         | 1.07              | 2.74      | 1.55   | 2.11      | 0.97   | 0.69     | 0.95   | 87.87    |
| <b>(h)</b> $[\text{C}_2\text{C}_1\text{IM}]$<br>$[\text{C}_6\text{H}_{13}\text{SO}_4]$             | N1 | 1.44             | 169.40                                      | 1.09              | 2.53      | 1.20   | 2.04      | 0.83   | 0.72     | 0.96   | 30.22    |
|                                                                                                    | N3 | 3.97             | 170.35                                      | 4.14 <sup>a</sup> | 2.03      | 1.35   | 1.10      | 0.41   | 1.00     | 1.00   | 18.18    |
| <b>(i)</b> $[\text{C}_2\text{C}_1\text{IM}]$<br>$[\text{N}(\text{CN})_2]$                          | N1 | 1.10             | 57.97 <sup>a</sup>                          | 1.03              | 7.84      | 6.60   | 6.81      | 5.08   | -0.51    | 0.65   | 76.19    |
|                                                                                                    | N3 | 1.18             | 54.67                                       | 1.04              | 7.34      | 6.52   | 6.32      | 4.93   | -0.43    | 0.66   | 102.53   |
| <b>(j)</b> $[\text{C}_2\text{C}_1\text{IM}]$<br>$[\text{SCN}]$                                     | N1 | 0.97             | 86.16 <sup>a</sup>                          | 1.15              | 9.41      | 5.09   | 8.08      | 3.97   | 0.00     | 0.85   | 119.67   |
|                                                                                                    | N3 | 0.83             | 106.53 <sup>a</sup>                         | 1.19              | 8.42      | 4.01   | 7.27      | 3.21   | 0.09     | 0.87   | 132.30   |

<sup>a</sup> results were only obtained with fitting parameter outside specified bounds

$$d = -(\mu_0 \hbar \gamma_N \gamma_H) / (8\pi r_{NH}^3) \quad (S34)$$

$$c = -\omega_N (\delta_{||} - \delta_{\perp}) / 3 \quad (S35)$$

$$J(\omega) = \frac{2}{5} \left( \frac{\tau_c}{1 + (\omega\tau_c)^2} \right) \quad (S36)$$

$$R_1 = \frac{1}{T_1} = 3(d^2 + c^2)J(\omega_N) + d^2[J(\omega_H - \omega_N) + 6J(\omega_H + \omega_N)] \quad (S37)$$

$$R_2 = \frac{1}{T_2} = \frac{1}{2}(d^2 + c^2)[4J(0) + 3J(\omega_N)] + \frac{1}{2}d^2[J(\omega_H - \omega_N) + 6J(\omega_H) + 6J(\omega_H + \omega_N)] \quad (S38)$$

$$NOE = 1 + \frac{\gamma_H}{\gamma_N} d^2 \frac{[6J(\omega_H + \omega_N) - J(\omega_H - \omega_N)]}{R_1} \quad (S39)$$

**Table S 9** Best-fit globally optimized parameters and calculated  $^{15}\text{N}$  relaxation times ( $T_1$ ,  $T_2$ ) and  $^{15}\text{N}$ - $\{^1\text{H}\}$  NOEs ( $NOE$ ) of  $[\text{C}_2\text{C}_1\text{IM}]^+$ -based ILs at 293.2 K. Experimental  $T_1$ ,  $T_2$  and  $NOE$  values are taken from Table 2 of the main manuscript. Eqs. (S34) to (S39) were employed for global optimization.

|                                                                                                    |    | $\tau_c$<br>[ns] | $ (\delta_{  } - \delta_{\perp}) $<br>[ppm] | $T_1$ [s] |        | $T_2$ [s] |        | $NOE$    |        | $\chi^2$ |
|----------------------------------------------------------------------------------------------------|----|------------------|---------------------------------------------|-----------|--------|-----------|--------|----------|--------|----------|
|                                                                                                    |    |                  |                                             | 40.6 MHz  | 71 MHz | 40.6 MHz  | 71 MHz | 40.6 MHz | 71 MHz |          |
| <b>(a)</b> $[\text{C}_2\text{C}_1\text{IM}]$<br>$[\text{CH}_3\text{CO}_2]$                         | N1 | 1.21             | 166.93                                      | 2.58      | 1.28   | 2.14      | 0.94   | 0.45     | 0.93   | 12.57    |
|                                                                                                    | N3 | 1.34             | 163.93                                      | 2.36      | 1.24   | 1.94      | 0.88   | 0.47     | 0.93   | 7.12     |
| <b>(b)</b> $[\text{C}_2\text{C}_1\text{IM}]$<br>$[\text{CF}_3\text{CO}_2]$                         | N1 | 0.13             | 241.13                                      | 10.23     | 4.42   | 9.22      | 3.86   | -0.68    | 0.39   | 151.04   |
|                                                                                                    | N3 | 0.10             | 281.13 <sup>a</sup>                         | 9.70      | 4.05   | 8.70      | 3.53   | -0.53    | 0.44   | 118.54   |
| <b>(c)</b> $[\text{C}_2\text{C}_1\text{IM}]$<br>$[\text{BF}_4]$                                    | N1 | 0.08             | 250.00                                      | 15.86     | 6.74   | 14.28     | 5.89   | -0.66    | 0.34   | 327.75   |
|                                                                                                    | N3 | 0.09             | 250.00                                      | 13.32     | 5.83   | 12.05     | 5.10   | -0.80    | 0.28   | 401.96   |
| <b>(d)</b> $[\text{C}_2\text{C}_1\text{IM}]$<br>$[(\text{C}_2\text{F}_5)_3\text{PF}_3]$            | N1 | 1.25             | 0.18 <sup>a</sup>                           | 8.16      | 11.10  | 7.05      | 8.39   | -0.68    | 0.39   | 256.80   |
|                                                                                                    | N3 | 1.23             | 72.14 <sup>a</sup>                          | 5.27      | 4.29   | 4.49      | 3.19   | -0.25    | 0.73   | 276.12   |
| <b>(e)</b> $[\text{C}_2\text{C}_1\text{IM}]$<br>$[(\text{C}_2\text{H}_5)_2\text{PO}_4]$            | N1 | 6.43             | 160.91                                      | 1.84      | 1.85   | 0.63      | 0.28   | 0.92     | 0.98   | 27.83    |
|                                                                                                    | N3 | 6.14             | 159.37                                      | 1.75      | 1.79   | 0.63      | 0.29   | 0.91     | 0.98   | 35.01    |
| <b>(f)</b> $[\text{C}_2\text{C}_1\text{IM}]$<br>$[\text{C}_2\text{H}_5\text{SO}_4]$                | N1 | 1.34             | 101.83 <sup>a</sup>                         | 4.26      | 2.75   | 3.54      | 1.97   | 0.17     | 0.86   | 128.38   |
|                                                                                                    | N3 | 1.17             | 145.42                                      | 3.01      | 1.62   | 2.53      | 1.21   | 0.25     | 0.89   | 62.49    |
| <b>(g)</b> $[\text{C}_2\text{C}_1\text{IM}]$<br>$[(\text{C}_5\text{H}_{11}\text{O}_2)\text{SO}_4]$ | N1 | 1.40             | 136.07                                      | 3.05      | 1.70   | 2.49      | 1.20   | 0.43     | 0.92   | 38.03    |
|                                                                                                    | N3 | 1.71             | 127.89                                      | 2.73      | 1.72   | 2.16      | 1.11   | 0.50     | 0.92   | 102.11   |
| <b>(h)</b> $[\text{C}_2\text{C}_1\text{IM}]$<br>$[\text{C}_6\text{H}_{13}\text{SO}_4]$             | N1 | 1.48             | 162.09                                      | 2.34      | 1.23   | 1.89      | 0.85   | 0.58     | 0.94   | 91.67    |
|                                                                                                    | N3 | 2.60             | 144.50                                      | 1.93      | 1.38   | 1.34      | 0.67   | 0.76     | 0.96   | 40.25    |
| <b>(i)</b> $[\text{C}_2\text{C}_1\text{IM}]$<br>$[\text{N}(\text{CN})_2]$                          | N1 | 1.17             | 49.71 <sup>a</sup>                          | 7.05      | 6.75   | 6.10      | 5.13   | -0.53    | 0.60   | 79.62    |
|                                                                                                    | N3 | 1.10             | 47.86 <sup>a</sup>                          | 6.58      | 6.60   | 5.75      | 5.11   | -0.71    | 0.53   | 120.61   |
| <b>(j)</b> $[\text{C}_2\text{C}_1\text{IM}]$<br>$[\text{SCN}]$                                     | N1 | 0.10             | 300.52 <sup>a</sup>                         | 9.73      | 3.88   | 8.66      | 3.36   | -0.27    | 0.55   | 168.43   |
|                                                                                                    | N3 | 0.08             | 365.32 <sup>a</sup>                         | 8.42      | 3.23   | 7.44      | 2.79   | -0.05    | 0.63   | 154.02   |

<sup>a</sup> results were only obtained with fitting parameter outside specified bounds

**Table S 10** Contribution (in %) of the various relaxation mechanisms to the overall  $T_1$  relaxation time at the both magnetic field strengths used in this study. Reported are the contribution by dipolar interaction, relaxation by chemical shift anisotropy (CSA) and contributions of  $^{19}\text{F}$  in the anions or the anion in general ( $D$ ).

|                                                                                                        |    | $T_1$ (40.6 MHz) |       |       | $T_1$ (71 MHz) |       |       |
|--------------------------------------------------------------------------------------------------------|----|------------------|-------|-------|----------------|-------|-------|
|                                                                                                        |    | dipolar          | CSA   | $D$   | dipolar        | CSA   | $D$   |
| <b>(a)</b> [ $\text{C}_2\text{C}_1\text{IM}$ ]<br>[ $\text{CH}_3\text{CO}_2$ ]                         | N1 | 21.90            | 78.10 | -     | 6.87           | 93.13 | -     |
|                                                                                                        | N3 | 20.13            | 79.87 | -     | 6.22           | 93.78 | -     |
| <b>(b)</b> [ $\text{C}_2\text{C}_1\text{IM}$ ]<br>[ $\text{CF}_3\text{CO}_2$ ]                         | N1 | 25.18            | 54.37 | 20.46 | 9.90           | 80.20 | 9.90  |
|                                                                                                        | N3 | 28.30            | 62.16 | 9.53  | 10.36          | 85.34 | 4.30  |
| <b>(c)</b> [ $\text{C}_2\text{C}_1\text{IM}$ ]<br>[ $\text{BF}_4$ ]                                    | N1 | 18.11            | 42.49 | 39.39 | 9.07           | 69.79 | 21.14 |
|                                                                                                        | N3 | 19.67            | 42.61 | 37.72 | 10.13          | 69.72 | 20.15 |
| <b>(d)</b> [ $\text{C}_2\text{C}_1\text{IM}$ ]<br>[ $(\text{C}_2\text{F}_5)_3\text{PF}_3$ ]            | N1 | 14.33            | 56.87 | 28.79 | 5.97           | 80.67 | 13.35 |
|                                                                                                        | N3 | 13.17            | 49.11 | 37.72 | 5.40           | 75.55 | 19.05 |
| <b>(e)</b> [ $\text{C}_2\text{C}_1\text{IM}$ ]<br>[ $(\text{C}_2\text{H}_5)_2\text{PO}_4$ ]            | N1 | 26.30            | 73.70 | -     | 10.00          | 90.00 | -     |
|                                                                                                        | N3 | 26.33            | 73.67 | -     | 10.05          | 89.95 | -     |
| <b>(f)</b> [ $\text{C}_2\text{C}_1\text{IM}$ ]<br>[ $\text{C}_2\text{H}_5\text{SO}_4$ ]                | N1 | 18.92            | 81.08 | -     | 5.33           | 94.67 | -     |
|                                                                                                        | N3 | 17.58            | 82.42 | -     | 4.88           | 95.12 | -     |
| <b>(g)</b> [ $\text{C}_2\text{C}_1\text{IM}$ ]<br>[ $(\text{C}_5\text{H}_{11}\text{O}_2)\text{SO}_4$ ] | N1 | 25.09            | 74.91 | -     | 8.36           | 91.64 | -     |
|                                                                                                        | N3 | 26.30            | 73.70 | -     | 9.12           | 90.88 | -     |
| <b>(h)</b> [ $\text{C}_2\text{C}_1\text{IM}$ ]<br>[ $\text{C}_6\text{H}_{13}\text{SO}_4$ ]             | N1 | 19.82            | 80.18 | -     | 6.73           | 93.27 | -     |
|                                                                                                        | N3 | 27.84            | 72.16 | -     | 10.61          | 89.39 | -     |
| <b>(i)</b> [ $\text{C}_2\text{C}_1\text{IM}$ ]<br>[ $\text{N}(\text{CN})_2$ ]                          | N1 | 31.22            | 68.78 | -     | 11.90          | 88.10 | -     |
|                                                                                                        | N3 | 31.76            | 68.24 | -     | 11.89          | 88.11 | -     |
| <b>(j)</b> [ $\text{C}_2\text{C}_1\text{IM}$ ]<br>[ $\text{SCN}$ ]                                     | N1 | 10.87            | 40.78 | 48.35 | 5.59           | 68.05 | 26.35 |
|                                                                                                        | N3 | 10.09            | 40.29 | 49.63 | 5.22           | 67.59 | 27.19 |

**Table S 11** Contribution (in %) of the various relaxation mechanisms to the overall  $T_2$  relaxation time at the both magnetic field strengths used in this study. Reported are the contribution by dipolar interaction and relaxation by chemical shift anisotropy (CSA). Field strength dependent contributions from chemical exchange and other undefined sources are summarized in  $B$  and  $D$ , respectively.

|                                                                                                        |    | $T_2$ (40.6 MHz) |       |       | $T_2$ (71 MHz) |       |       |
|--------------------------------------------------------------------------------------------------------|----|------------------|-------|-------|----------------|-------|-------|
|                                                                                                        |    | dipolar          | CSA   | $B$   | dipolar        | CSA   | $C$   |
| <b>(a)</b> [ $\text{C}_2\text{C}_1\text{IM}$ ]<br>[ $\text{CH}_3\text{CO}_2$ ]                         | N1 | 9.71             | 38.01 | 52.28 | 5.72           | 81.87 | 12.41 |
|                                                                                                        | N3 | 10.98            | 47.81 | 41.21 | 5.91           | 94.09 | 0.00  |
| <b>(b)</b> [ $\text{C}_2\text{C}_1\text{IM}$ ]<br>[ $\text{CF}_3\text{CO}_2$ ]                         | N1 | 5.53             | 13.90 | 80.57 | 4.61           | 43.14 | 52.25 |
|                                                                                                        | N3 | 9.73             | 24.90 | 65.37 | 6.32           | 60.12 | 33.56 |
| <b>(c)</b> [ $\text{C}_2\text{C}_1\text{IM}$ ]<br>[ $\text{BF}_4$ ]                                    | N1 | 3.71             | 10.16 | 86.12 | 3.50           | 31.39 | 65.11 |
|                                                                                                        | N3 | 5.90             | 14.91 | 79.19 | 4.77           | 38.31 | 56.91 |
| <b>(d)</b> [ $\text{C}_2\text{C}_1\text{IM}$ ]<br>[ $(\text{C}_2\text{F}_5)_3\text{PF}_3$ ]            | N1 | 2.91             | 13.46 | 83.64 | 2.52           | 39.57 | 57.91 |
|                                                                                                        | N3 | 3.84             | 16.68 | 79.48 | 2.27           | 36.66 | 61.07 |
| <b>(e)</b> [ $\text{C}_2\text{C}_1\text{IM}$ ]<br>[ $(\text{C}_2\text{H}_5)_2\text{PO}_4$ ]            | N1 | 7.15             | 20.79 | 72.06 | 4.72           | 43.71 | 51.57 |
|                                                                                                        | N3 | 12.92            | 37.47 | 49.61 | 6.24           | 57.37 | 36.40 |
| <b>(f)</b> [ $\text{C}_2\text{C}_1\text{IM}$ ]<br>[ $\text{C}_2\text{H}_5\text{SO}_4$ ]                | N1 | 5.85             | 28.97 | 65.18 | 3.45           | 68.87 | 27.68 |
|                                                                                                        | N3 | 7.22             | 39.07 | 53.71 | 3.68           | 80.42 | 15.90 |
| <b>(g)</b> [ $\text{C}_2\text{C}_1\text{IM}$ ]<br>[ $(\text{C}_5\text{H}_{11}\text{O}_2)\text{SO}_4$ ] | N1 | 12.27            | 39.75 | 47.98 | 6.61           | 75.97 | 17.42 |
|                                                                                                        | N3 | 17.11            | 51.46 | 31.43 | 8.46           | 87.83 | 3.72  |
| <b>(h)</b> [ $\text{C}_2\text{C}_1\text{IM}$ ]<br>[ $\text{C}_6\text{H}_{13}\text{SO}_4$ ]             | N1 | 7.86             | 33.70 | 58.44 | 3.72           | 53.43 | 42.84 |
|                                                                                                        | N3 | 15.07            | 40.70 | 44.23 | 6.91           | 59.96 | 33.13 |
| <b>(i)</b> [ $\text{C}_2\text{C}_1\text{IM}$ ]<br>[ $\text{N}(\text{CN})_2$ ]                          | N1 | 8.05             | 20.69 | 71.28 | 6.52           | 56.24 | 37.24 |
|                                                                                                        | N3 | 10.61            | 26.59 | 62.81 | 7.41           | 63.85 | 28.74 |
| <b>(j)</b> [ $\text{C}_2\text{C}_1\text{IM}$ ]<br>[ $\text{SCN}$ ]                                     | N1 | 2.39             | 10.46 | 87.15 | 2.30           | 32.68 | 65.02 |
|                                                                                                        | N3 | 2.84             | 13.25 | 83.91 | 2.48           | 37.39 | 49.63 |
